# Supplementary material for: Investigating the Impact of Mechanical Properties and Cell-Collagen Interaction on NIH3T3 Function: A Comparative Study on Different Substrates and Culture Environments
Source: MDPI journal article supplement (doi:10.3390/gels9120922), 2023-11-22
Supplement: s1 [file s1]

## Supplementary Materials

# Investigating the Impact of Mechanical Properties and Cell-Collagen Interaction on NIH3T3 Function: A Comparative Study on Different Substrates and Culture Environments

A Yeon Cho <sup>1</sup> and Hyun Jong Lee <sup>1,\*</sup>

<sup>1</sup>Department of Chemical and Biological Engineering, Gachon University, 1342 Seongnam-daero, Seongnam-si 13120, Republic of Korea

\* Correspondence: [hjlee2@gachon.ac.kr](mailto:hjlee2@gachon.ac.kr) (H.J.L.)

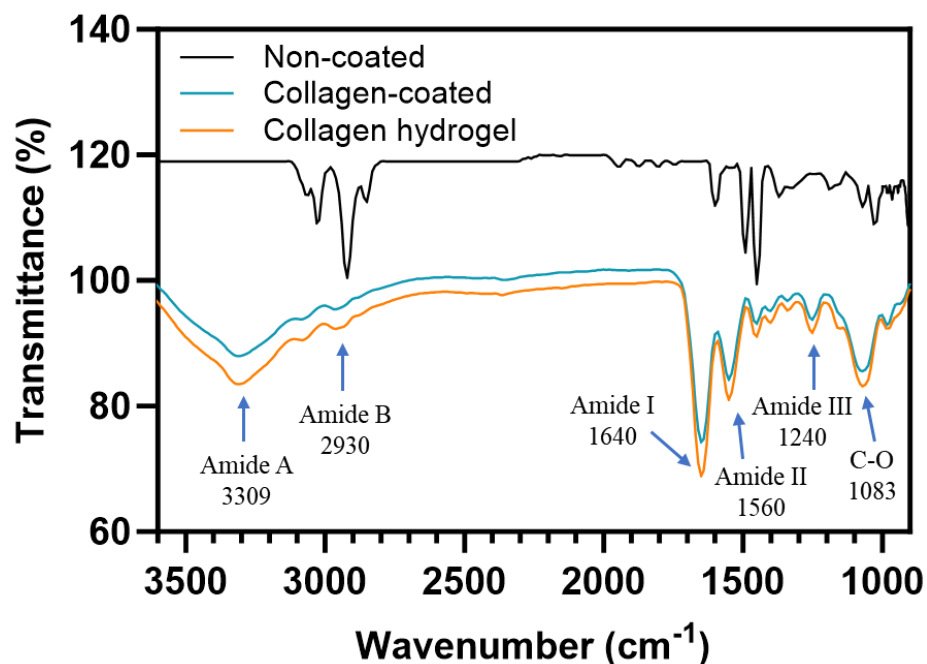

**Figure S1.** ATR FT-IR of plastic (black), collagen (blue) and collagen with riboflavin 5'-phosphate (orange). The peaks of each functional group: Amide A: 3309 cm<sup>-1</sup>, Amide B: 2930 cm<sup>-1</sup>, Amides I: 1640 cm<sup>-1</sup>, Amides II: 1560 cm<sup>-1</sup>, Amides III: 1240 cm<sup>-1</sup>, C-O: 1170 cm<sup>-1</sup>.
